# Supplementary material
Source: HighWire-hosted journal article supplement (https://rmdopen.bmj.com/content/6/2/e001261)
Supplement: inline-supplementary-material-2 [file inline-supplementary-material-2.pdf]

Supplementary figure 1

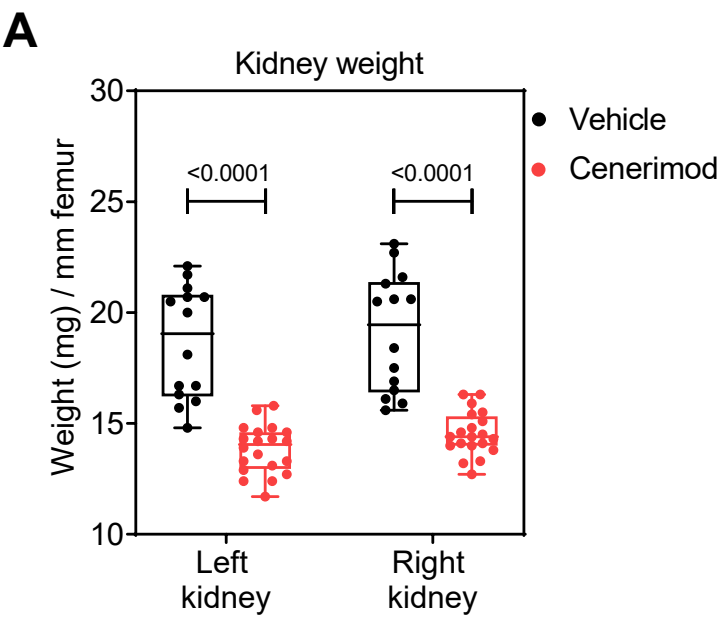

**Supplementary figure 1**  
(A) Weight of kidneys normalized to femur length at end of treatment (treatment week 11). Each data point represents the measurement of individual mice. Box and whisker plots, the whiskers indicate the minimum and maximum range; p-values are given (Mann-Whitney test).
