# Supplementary material
Source: HighWire-hosted journal article supplement (https://rmdopen.bmj.com/content/6/2/e001261)
Supplement: inline-supplementary-material-3 [file inline-supplementary-material-3.pdf]

Supplementary figure 2

A Non-interventional exploratory study

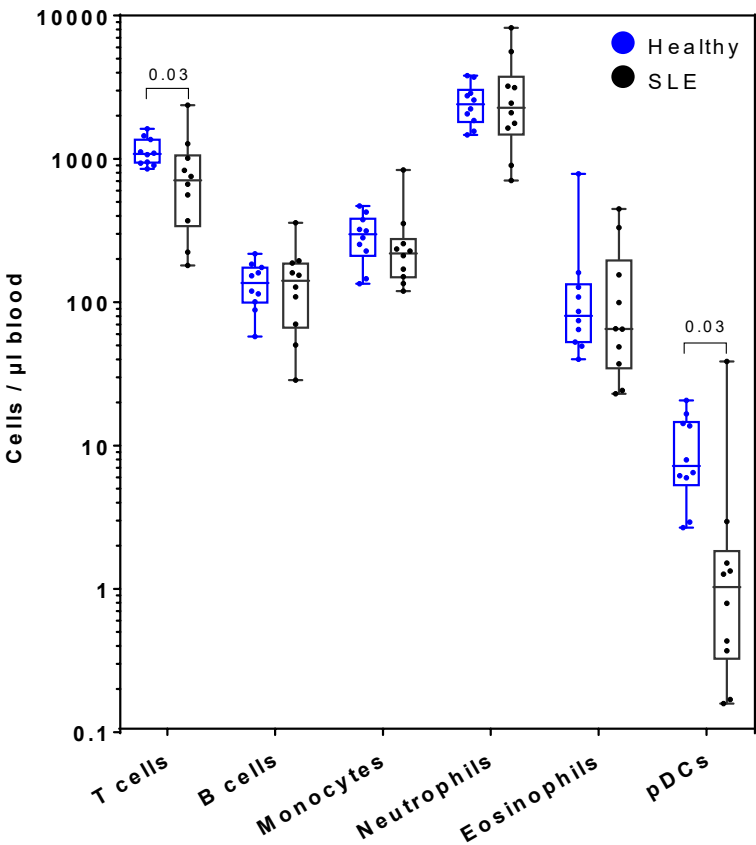

B Non-interventional exploratory study

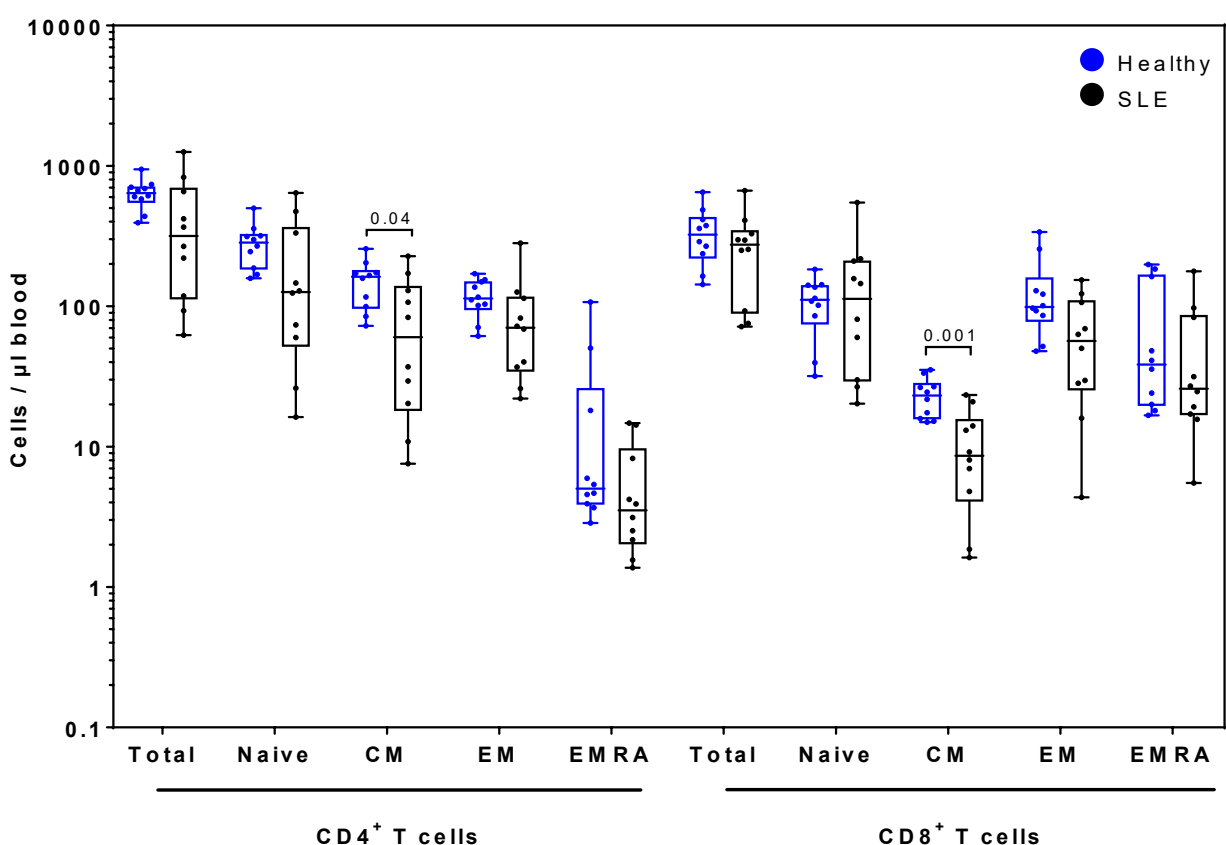

C Flow cytometry gating strategy for S1P<sub>1</sub> receptor mean fluorescence intensity quantification

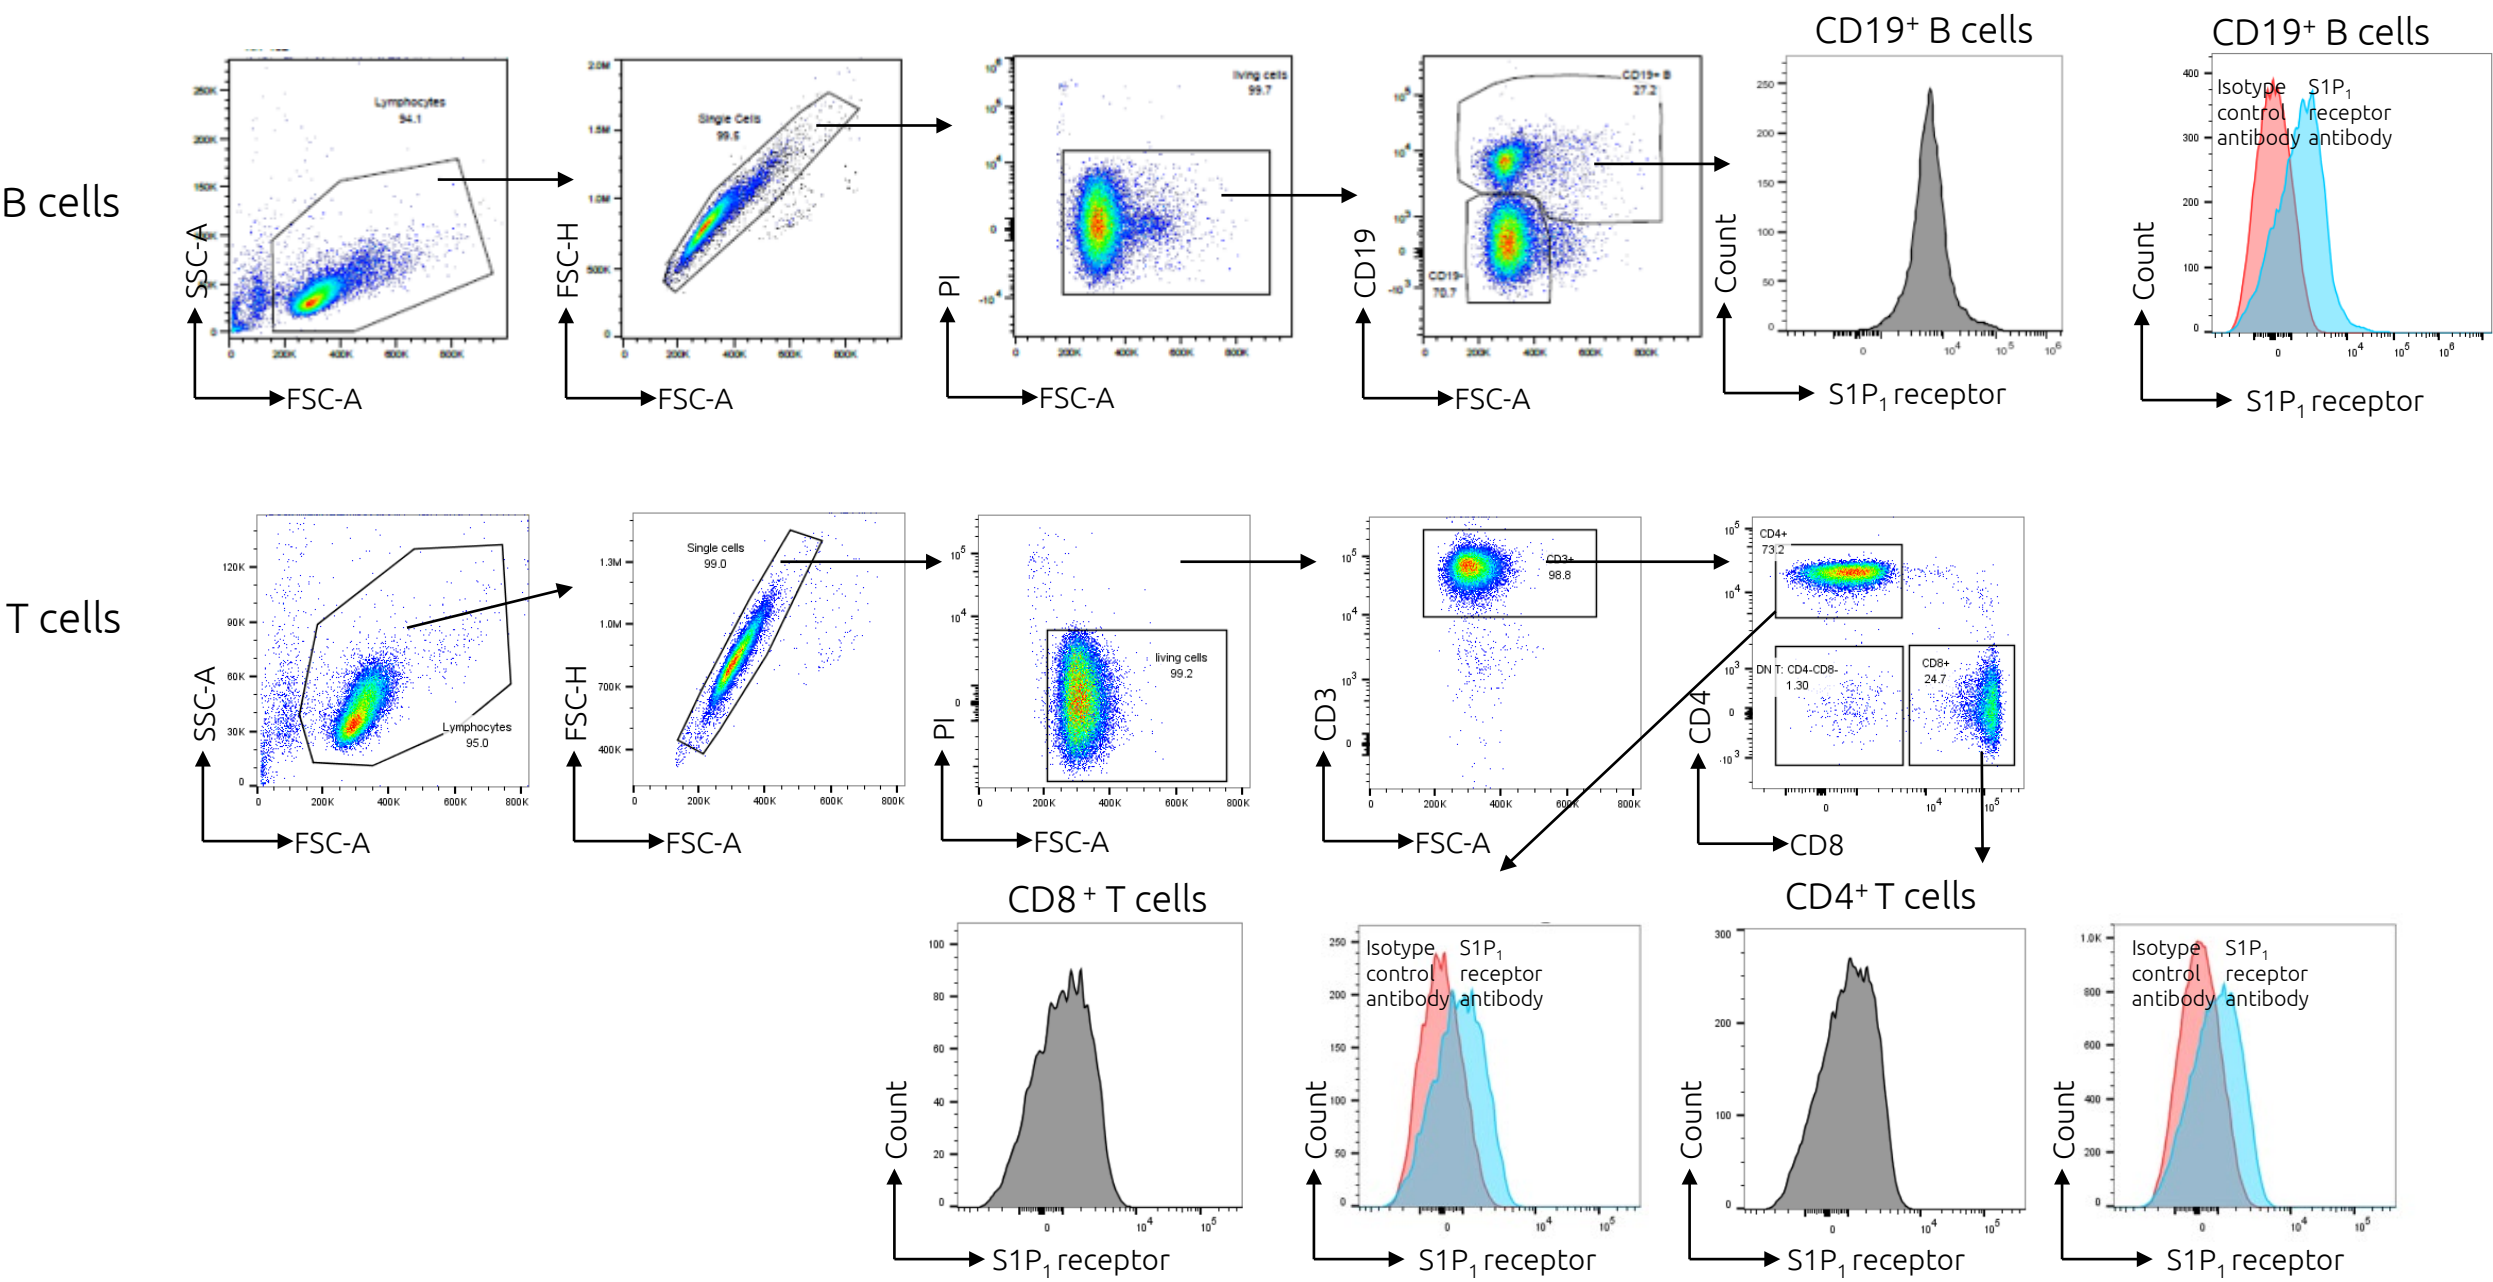

D Phase 2 SLE study at baseline (n=60)

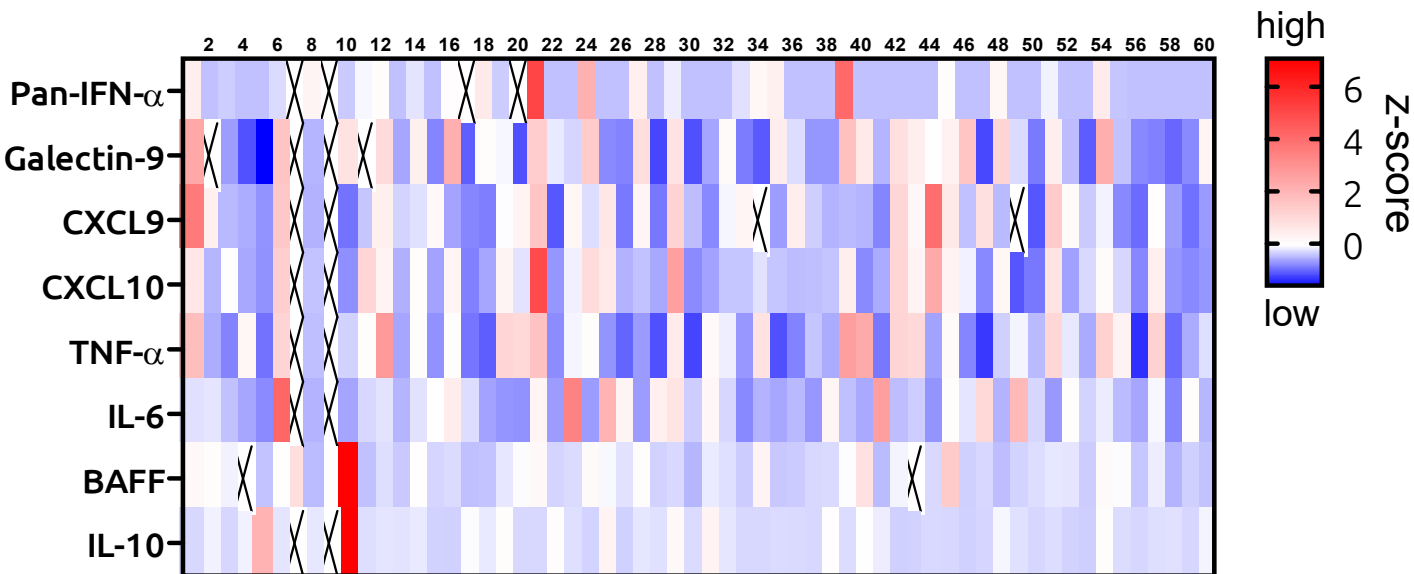

E Phase 2 SLE study at baseline (n=60)

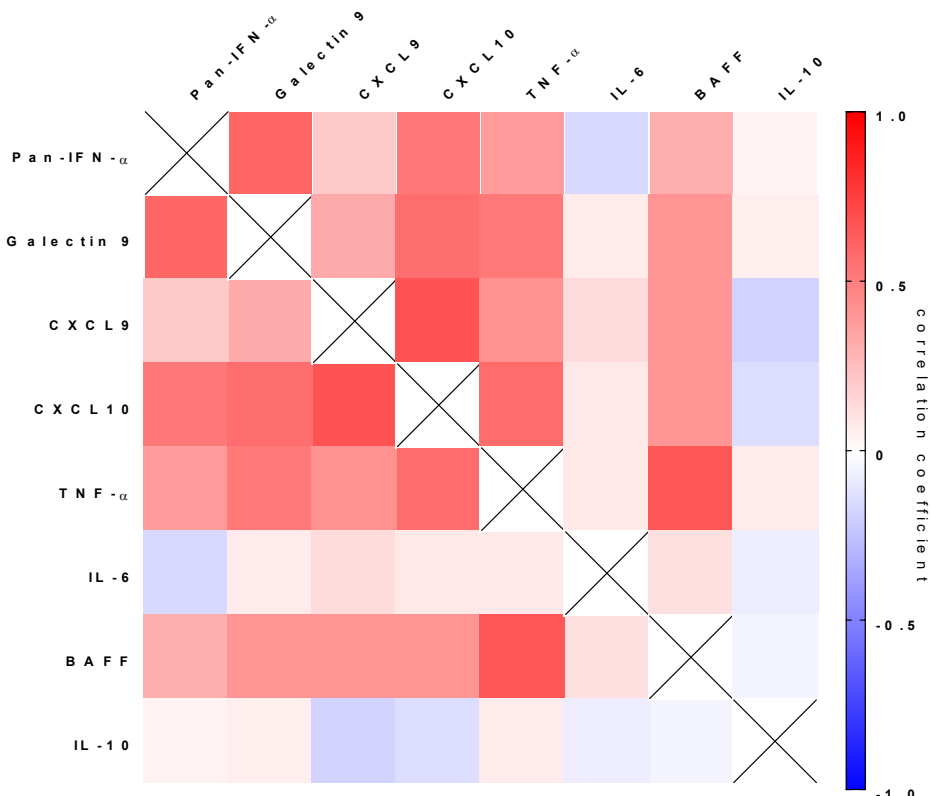

## Supplementary figure 2

### Supplementary figure 2

(A) Immune cell populations from healthy subjects (blue) and patients with SLE (black) from the non-interventional exploratory study were quantified by flow cytometry. (B) Blood T cell populations from healthy subjects and patients with SLE from the non-interventional exploratory study were quantified by flow cytometry. (C) Representative examples of the flow cytometry gating strategy for blood B and T cells for S1P<sub>1</sub> receptor mean fluorescent intensity quantification from the non-interventional exploratory study. The red peak represents the isotype control for S1P<sub>1</sub> receptor. (D) Heatmap of z-score normalized biomarker levels for each individual subject in the phase 2 SLE study. (E) Heatmap of Spearman rank correlation (r) of biomarkers in patients with SLE from the phase 2 SLE study at baseline. Red represents positive and blue negative Spearman rank correlation; p-values are given where statistically significant (Mann-Whitney t-test).
